# Supplementary material for: Validation of Minnesota acute graft-versus-host disease Risk Score
Source: PubMed Central journal article supplement — Haematologica. 2019 Jul 18;105(2):519–24. doi: 10.3324/haematol.2019.220970 (PMC7012472; doi:10.3324/haematol.2019.220970), 2020-02
Supplement: 2019_220970-Disclosures_and_Contributions.pdf [file 2019_220970-Disclosures_and_Contributions.pdf]

Haematologica  
HAEMATOL/2019/220970  
Version 3

Validation of Minnesota acute graft-versus-host disease Risk Score

Margaret L. MacMillan, Todd E. DeFor, Sherman G. Holtan, Armin  
Rashidi, Bruce R. Blazar, and Daniel J. Weisdorf

Disclosures: None.

Contributions: All authors contributed equally to the conception, design, and interpretation of data, and approval of the final manuscript. M.L.M., S.G.H, A.R. and D.J.W. scored response to steroid therapy. T.E.D. performed the statistical analysis; and M.L.M. had primary responsibility for drafting the manuscript. All authors reviewed, edited and approved the manuscript.
